# Supplementary material for: Repeatability of Feather Mite Prevalence and Intensity in Passerine Birds
Source: PLOS journal article supplement (doi:10.1371/journal.pone.0107341), 2014-09-12

## Supporting Information

### Repeatability of feather mite prevalence and intensity in passerine birds Díaz-Real et al.

#### Extended Ethical Statement.

O. Frias: Bird ringing was done under the Spanish Ministry of Agriculture, Food and Environment ringing licence number 530340

J. Monros: Bird ringing was done under the Spanish Ministry of Agriculture, Food and Environment ringing licence number 440066.

A. Mestre: Bird ringing was done under the Spanish Ministry of Agriculture, Food and Environment ringing licence number 440102.

F. Atienzar: Bird ringing was done under the Spanish Ministry of Agriculture, Food and Environment ringing licence number 440100.

J. Figuerola: The study was done with the Scientific Permit issued by Generalitat de Catalunya with number 660117.

E. Barba: Bird ringing was done under the Spanish Ministry of Agriculture, Food and Environment ringing licence number 440065.

M. Vogeli, J.L. Tella and D. Serrano: The study was conducted in compliance with the current laws of the Spanish Government and scientific permits issued by the Gobierno de Aragón (permit numbers: R-41504; LCE/mp 24/2007/1254), Gobierno de Navarra (XXX), Junta de Castilla y León (EP/CYL/215/2007) and Junta de Andalucía (SCCFS-AFR/CMM). Bird ringing was done by MV under the Spanish Ministry of Environment ringing licence number 660152.

G. Blanco: Birds were sampled during regular population monitoring activities authorized by the Spanish Ministry of Agriculture, Food and Environment and Regional Governments: ringing license number 530115.

J. Perez Tris: Birds were sampled during regular population monitoring activities authorized by the Spanish Regional Governments to the licensed bird ringers nr. 530326 (JP), 530334 (AB), 530354 (JP-T), 530356 (JAC), 530362 (RM-O), 530365 (JLM), 530370 (CP), 530381 (DP).

A. P. Moller: Bird sampling was done in Denmark under the licence number A351. See documents below for Ukraine licences.

P. L. Pap: Birds were sampled in Romania under the ringing license number is 726965.

C. I. Vágási: Birds were sampled under the ringing license number 423522 emitted by the Romanian Ornithological Center.

JC Senar: Bird ringing was done under the Generalitat de Catalunya ringing licence number SF387

A. Borrás: Bird ringing was done under the Generalitat de Catalunya Ringing Licence number SF314

R. Jovani: The study was done with the Scientific Permit issued by Generalitat de Catalunya with number 43430497

**«ЗАТВЕРДЖУЮ»**

Перший заступник голови  
Державного агентства України  
з управління зоною відчуження

  
Д.Г.Бобро  
« 22 » 05 2012 р.

## П Р О Г Р А М А

*відвідування зони відчуження і зони безумовного (обов'язкового) відселення  
групою вчених Університету Південної Кароліни  
та Київського національного Університету  
№ 396-і від 21.05.2012 р.*

**Мета відвідування:** проведення спільних досліджень

**Маршрут відвідування:** № 1, № 2, № 3, № 4, № 6, № 7 (КПП «Дитятки», «Делів», «Прип'ять», «Діброва», «Паришів-2», «Бенівка», «Овруч», «Поліське»)

**Обсяг і характер інформації:** офіційна загальна інформація про зону відчуження та стан радіоактивного забруднення

**Особи, з якими заплановано зустрічі:** офіційні особи, що працюють в зоні відчуження

**Відповідальний за підготовку та виконання програми:** Кіреєв С.І., Полякова М.О. (ДСП «ЧСК»)

**Супроводжуюча особа:** Чижевський І.В. (ДСП «ЧСК»)

**Транспорт:** автомобілі «Форд Скорпіо» № АІ 7231 ВК (автопричеп № АІ 6785 ХР), «Хюндай Туксон» № АА 7932 ІТ, «Форд Скорпіон» № 73984 КН, «Деу Ланос» № АІ 6972 ВА, «Фіат Добло» № АІ 4898 СХ, «Дачія Логін» № АІ 6436 АО

**Термін відвідування:** 25 травня – 01 червня 2012 р.

**24 травня: 12.00-22.00** Проїзд КПП «Дитятки». Інструктаж з дотримання правил радіаційної безпеки та інформаційна бесіда із представником ДСП «Чорнобильський спецкомбінат»  
Прибуття в м. Чорнобиль. Розміщення у будинку іноземного фахівця. (ДП «Чорнобильінтерінформ»)

**24 травня-01 червня: 05.00- 23.00** Проведення польових досліджень на дослідних полігонах ВКРМРДК «Екоцентр» («Рудий Ліс», «став охолоджувач»), м. Прип'ять (без відвідування будівель), Новошепелицьке лісництво, та в селах зони відчуження (с.с. Буряківка, Красниця, Весняне, Варовичі, Рудня-Іллінецька, Новошепеличі, Копачі, Лелів, Ямпіль, Рудьки, Товстий Ліс, Поліське, Роз'їдже, Паришів, Чистогалівка)

**01 червня: 17.00** Від'їзд до м. Києва

**Фото- і відеозйомка за маршрутом прямування в межах дії Закону України «Про використання атомної енергії та радіаційну безпеку» та Інструкції «Про порядок охорони державної таємниці, а також іншої інформації...».**

**Список відвідувачів зони відчуження і зони безумовного (обов'язкового) відселення:**

**«ЗАТВЕРДЖУЮ»**

Перший заступник голови  
Державного агентства України  
з управління зоною відчуження

  
Д.Г.Бобро  
« 22 » 05 2012 р.

## П Р О Г Р А М А

*відвідування зони відчуження і зони безумовного (обов'язкового) відселення  
групою вчених Університету Південної Кароліни  
та Київського національного Університету  
№ 396-і від 21.05.2012 р.*

**Мета відвідування:** проведення спільних досліджень

**Маршрут відвідування:** № 1, № 2, № 3, № 4, № 6, № 7 (КПП «Дитятки», «Делів», «Прип'ять», «Діброва», «Паришів-2», «Бенівка», «Овруч», «Поліське»)

**Обсяг і характер інформації:** офіційна загальна інформація про зону відчуження та стан радіоактивного забруднення

**Особи, з якими заплановано зустрічі:** офіційні особи, що працюють в зоні відчуження

**Відповідальний за підготовку та виконання програми:** Кіреєв С.І., Полякова М.О. (ДСП «ЧСК»)

**Супроводжуюча особа:** Чижевський І.В. (ДСП «ЧСК»)

**Транспорт:** автомобілі «Форд Скорпіо» № АІ 7231 ВК (автопричеп № АІ 6785 ХР), «Хюндай Туксон» № АА 7932 ІТ, «Форд Скорпіон» № 73984 КН, «Деу Ланос» № АІ 6972 ВА, «Фіат Добло» № АІ 4898 СХ, «Дачія Логін» № АІ 6436 АО

**Термін відвідування:** 25 травня – 01 червня 2012 р.

**24 травня: 12.00-22.00** Проїзд КПП «Дитятки». Інструктаж з дотримання правил радіаційної безпеки та інформаційна бесіда із представником ДСП «Чорнобильський спецкомбінат»  
Прибуття в м. Чорнобиль. Розміщення у будинку іноземного фахівця. (ДП «Чорнобильінтерінформ»)

**24 травня-01 червня: 05.00- 23.00** Проведення польових досліджень на дослідних полігонах ВКРМРДК «Екоцентр» («Рудий Ліс», «став охолоджувач»), м. Прип'ять (без відвідування будівель), Новошепелицьке лісництво, та в селах зони відчуження (с.с. Буряківка, Красниця, Весняне, Варовичі, Рудня-Іллінецька, Новошепеличі, Копачі, Лелів, Ямпіль, Рудьки, Товстий Ліс, Поліське, Роз'їдже, Паришів, Чистогалівка)

**01 червня: 17.00** Від'їзд до м. Києва

**Фото- і відеозйомка за маршрутом прямування в межах дії Закону України «Про використання атомної енергії та радіаційну безпеку» та Інструкції «Про порядок охорони державної таємниці, а також іншої інформації...».**

**Список відвідувачів зони відчуження і зони безумовного (обов'язкового) відселення:**

Додаток до Програми № 396-і від 21.05.2012 р.

Список

обладнання, що ввозиться до зони відчуження і зони безумовного (обов'язкового) відселення  
для виконання досліджень  
на період з 24 травня - 1 червня 2012р.

- Каністра металева 10 л - 1 шт.
- Центрифуга - 1 шт.
- Переносна електростанція SDMO - 1 шт.
- Каністра металева 5 л - 1 шт.
- Кондиціонер мобільний SATURN - 1 комплект.
- Палатка-тент Royal House каркасна - 3 шт.
- Стіл складний з лавами - 2 комплекти.
- Жердина стальна хромована - 108 шт.
- Цегла із свинцю - 10 шт.
- Жердина алюмінієва - 12 шт.
- Пилка ручна - 2 шт.
- Мачете - 2 шт.
- Дроби́на металева складна - 1 шт.
- Чайник електричний - 1 шт.
- Подовжувач 220В, 50 м - 1 шт.

«ПОГОДЖЕНО»

Завідувач сектору з питань режиму

« 21 »

С. В. Бірук  
2012 р.

**«ЗАТВЕРДЖУЮ»**

**Перший заступник голови  
Державного агентства України  
з управління зоною відчуження**

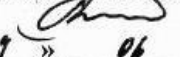  
**Д.Г.Бобро**  
« 12 » 06 2012 р.

## **ПРОГРАМА**

**відвідування зони відчуження і зони безумовного (обов'язкового) відселення  
групою вчених Університету Південної Кароліни  
та Київського національного Університету  
№ 560-і від 19.06.2012 р.**

**Мета відвідування:** проведення спільних досліджень

**Маршрут відвідування:** № 1, № 2, № 3, № 4, № 6, № 7 (КПП «Дитятки», «Лелів», «Прип'ять», «Діброва», «Овруч», «Поліське»)

**Обсяг і характер інформації:** офіційна загальна інформація про зону відчуження та стан радіоактивного забруднення

**Особи, з якими заплановано зустрічі:** офіційні особи, що працюють в зоні відчуження

**Відповідальний за підготовку та виконання програми:** Кіреєв С.І., Полякова М.О. (ДСП «ЧСК»)

**Супроводжуюча особа:** Чижевський І.В. (ДСП «ЧСК»)

**Транспорт:** автомобілі «Форд Скорпіо» № АІ 7231 ВК з автоприцепом № АІ 6785 ХР (водій Міліневський Леонід), «Хюндай Туксон» № АА 7932 ІТ, «Форд Скорпіон» № 73984 КН (водій Міліневський Геннадій), «Деу Ланос» № АІ 6972 ВА (водій Міліневський Сергій), «Фіат Добло» № АІ 4898 СХ (Гващенко Максим), «Дачія Логін» № АІ 6436 АО (водій Чижевський Ігор)

**Термін відвідування:** 22 червня - 02 липня 2012 р.

**22 червня: 15.00-22.00** Проїзд КПП «Дитятки». Інструктаж з дотримання правил радіаційної безпеки та інформаційна бесіда із представником ДСП «Чорнобильський спецкомбінат»

Прибуття в м. Чорнобиль. Розміщення у будинку іноземного фахівця. (ДП «Чорнобильінтерінформ»)

**22 червня-02 липня: 05.00- 23.00** Проведення польових досліджень на дослідних полігонах ВКРМРДК «Екоцентр» («Рудий Ліс», «став охолоджувач»), м. Прип'ять (без відвідування будівель), Новошепелицьке лісництво та в селах зони відчуження (с.с. Весняне, Рудня-Іллінецька, Новошепеличі, Поліське, Чистоголівка)

**02 липня: 17.00** Від'їзд до м. Києва

**Фото- і відеозйомка за маршрутом прямування в межах дії Закону України «Про використання атомної енергії та радіаційну безпеку» та Інструкції «Про порядок охорони державної таємниці, а також іншої інформації...».**

Список відвідувачів зони відчуження і зони безумовного (обов'язкового) відселення:

| №№  | Країна  | Прізвище та ім'я        | Дата народження | № паспорта |
|-----|---------|-------------------------|-----------------|------------|
| 1.  | США     | Тимоті Мюссе            | 10.10.1958      | 450066018  |
| 2.  | Італія  | Андреа Бонісолі-Алкуаті | 02.07.1980      | YA0427616  |
| 3.  | Україна | Станіслав Рушковський   | 01.01.1972      | ЕС643677   |
| 4.  | Україна | Леонід Міліневський     | 09.11.1946      | СК079746   |
| 5.  | Україна | Геннадій Міліневський   | 30.04.1951      | СН852438   |
| 6.  | Україна | Андрій Рожок            | 14.04.1979      | МЕ 370281  |
| 7.  | Україна | Сергій Міліневський     | 08.04.1971      | СК409357   |
| 8.  | Україна | Євген Тукаленко         | 05.07.1978      | СН 438442  |
| 9.  | Україна | Максим Іваненко         | 18.03.1968      | СО760042   |
| 10. | Україна | Володимир Безруков      | 23.08.1952      | СН 527047  |

Загальна кількість відвідувачів: 10 осіб

*Фото- і відеозйомка за маршрутом прямування в межах дії Закону України «Про використання ядерної енергії та радіаційну безпеку» та Інструкції «Про порядок охорони державної таємниці, а також іншої інформації...».*

Директор  
Центру ОТЗ ДСП «ЧСК»



М.В.Бойко

«ПОГОДЖЕНО»  
Завідувач сектора з питань режиму

«13»  
  
С.В.Бірук  
2012 р.

Начальник режимно-секретного відділу ДСП «ЧСК»

  
С.В.Манжос  
2012 р.

Підстава: Запит № 1573 від 13.06.2012 р.

| №№  | Країна  | Прізвище та ім'я        | Дата народження | № паспорта |
|-----|---------|-------------------------|-----------------|------------|
| 1.  | США     | Тимоті Мюссе            | 10.10.1958      | 450066018  |
| 2.  | Італія  | Андреа Бонісолі-Алкуаті | 02.07.1980      | YA0427616  |
| 3.  | Данія   | Андерс Моллер           | 26.12.1953      | 200080477  |
| 4.  | Данія   | Вільям Карое Аарестрап  | 27.08.1932      | 200569468  |
| 5.  | Україна | Геннадій Міліневський   | 30.04.1951      | CH852438   |
| 6.  | Україна | Леонід Міліневський     | 09.11.1946      | CK079746   |
| 7.  | Україна | Сергій Міліневський     | 08.04.1971      | CK409357   |
| 8.  | Україна | Станіслав Рушковський   | 01.01.1972      | EC643677   |
| 9.  | Україна | Максим Іваненко         | 18.03.1968      | CO760042   |
| 10. | Україна | Придюк Микола           | 19.11.1968      | CO286687   |

Загальна кількість відвідувачів: 10 осіб

*Фото- і відеозйомка за маршрутом прямування в межах дії Закону України «Про використання ядерної енергії та радіаційну безпеку» та Інструкції «Про порядок охорони державної таємниці, а також іншої інформації...».*

Заступник директора

Центру ОТЗ ДСП «ЧСК»

В.П.Махно

**«ПОГОДЖЕНО»**

Завідувач сектора з питань режиму

Начальник режимно-секретного відділу ДСП «ЧСК»

« 2/ »

С.В.Бірук  
2012 р.

С.В.Манжос  
2012 р.

Підстава: Запит № 1177 від 14.05.2012 р.

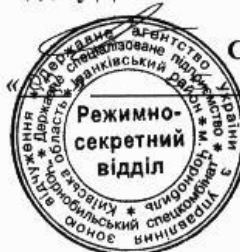

Supplement: S3 (10.1371/journal.pone.0107341.s003) [file journal.pone.0107341.s003]
